# Supplementary material for: Dendritic Mesoporous Silica Hollow Spheres for Nano-Bioreactor Application
Source: MDPI journal article supplement (doi:10.3390/nano12111940), 2022-06-06
Supplement: s1 [file s1]

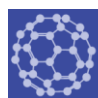

# Dendritic Mesoporous Silica Hollow Spheres for Nano-Bioreactor Application

Qian Zhang <sup>1</sup>, Minying Wu <sup>1</sup>, Yuanyuan Fang <sup>1</sup>, Chao Deng <sup>2</sup>, Hsin-Hui Shen <sup>3</sup>, Yi Tang <sup>1,\*</sup> and Yajun Wang <sup>2,\*</sup>

<sup>1</sup> Department of Chemistry, Fudan University, Shanghai 200433, China; 13110220006@fudan.edu.cn (Q.Z.); 18110220035@fudan.edu.cn (M.W.); 19110220078@fudan.edu.cn (Y.F.)

<sup>2</sup> College of Chemistry & Materials Engineering, Wenzhou University, Wenzhou 325027, China; dengchao@wzu.edu.cn

<sup>3</sup> Department of Materials Science and Engineering, Monash University, Clayton, VIC 3800, Australia; hsin-hui.shen@monash.edu

\* Correspondence: yitang@fudan.edu.cn (Y.T.); yajunwang@wzu.edu.cn (Y.W.)

## Synthesis of BaSO<sub>4</sub> NP-S and BaSO<sub>4</sub> NP-L

Based on the synthesis of BaSO<sub>4</sub> NP, when using a Ba-EDTA solution of pH 6.0, the sample denoted as **BaSO<sub>4</sub> NP-S** was obtained. And when using a Ba-EDTA solution of pH 9.0, 50 mL of Na<sub>2</sub>SO<sub>4</sub> and 200 mL of Ba-EDTA, the **BaSO<sub>4</sub> NP-L** was obtained. As shown in Figure S1a, most of the BaSO<sub>4</sub> NP-S have the shape of an ellipse other than spherical morphology of BaSO<sub>4</sub> NP used above, while a few particles of the BaSO<sub>4</sub> NP-L are elliptic in Figure S1c. The conditional stability constant of the complex of Ba<sup>2+</sup> and EDTA ions at pH 9.0 is higher than at pH 6.0, resulting in a slower rate of the precipitation of BaSO<sub>4</sub> and smaller size. When amplifying the reaction system at pH 6.0, same with BaSO<sub>4</sub> NP, once the large volumes of reaction solution was added, a faster rate and local high concentration led to a larger particle and wider size distribution.

## Specific Enzyme Activity Measurement

First, immobilized or free catalase was dispersed into a 2 mL of phosphate buffered solution (PBS, 50 mmol L<sup>-1</sup>, pH 7.0, 25 °C) containing H<sub>2</sub>O<sub>2</sub> (20 mmol L<sup>-1</sup>), and the concentration of catalase was 2.0 µg mL<sup>-1</sup>. The absorbance at 240 nm was monitored to track changes in H<sub>2</sub>O<sub>2</sub> concentration. The standard curve is shown in Figure S7a.

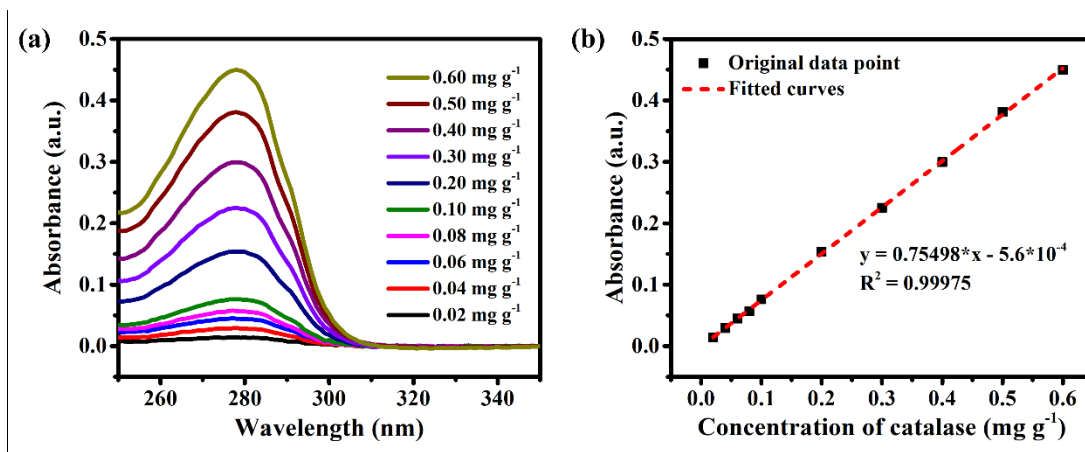

**Figure S1.** (a) UV-vis spectra of standard catalase solution and (b) the corresponding standard curve.

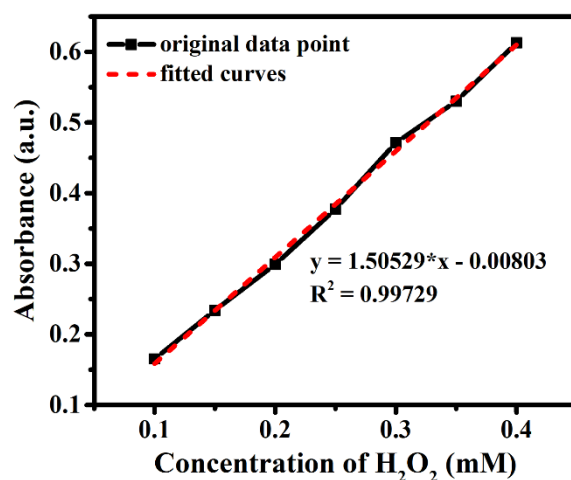

Figure S2. The standard curve for the  $\text{H}_2\text{O}_2$  detection using HRP-TMB method.

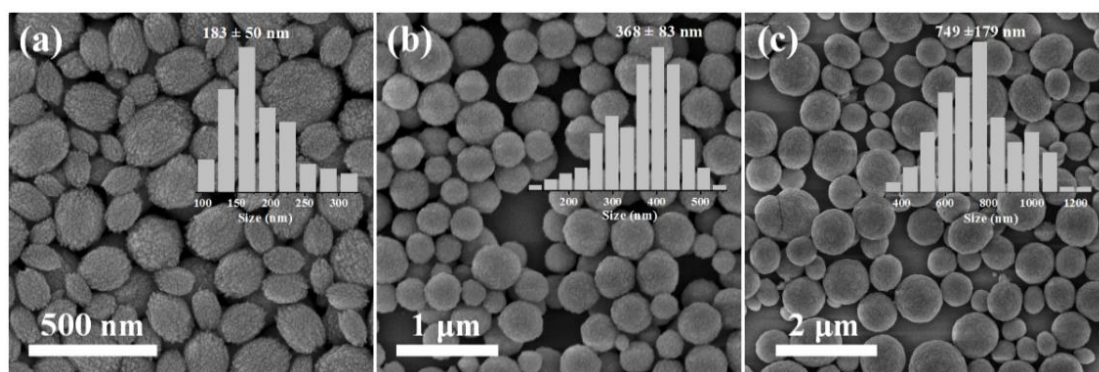

Figure S3. SEM images of different  $\text{BaSO}_4$  NPs: (a)  $\text{BaSO}_4$  NP-S, (b)  $\text{BaSO}_4$  NP, and (c)  $\text{BaSO}_4$  NP-L, and their corresponding particle size distributions (insets) obtained by the SEM images statistics. The numbers of particles counted for  $\text{BaSO}_4$  NP-S,  $\text{BaSO}_4$  NP, and  $\text{BaSO}_4$  NP-L were 109, 127, and 139, respectively.

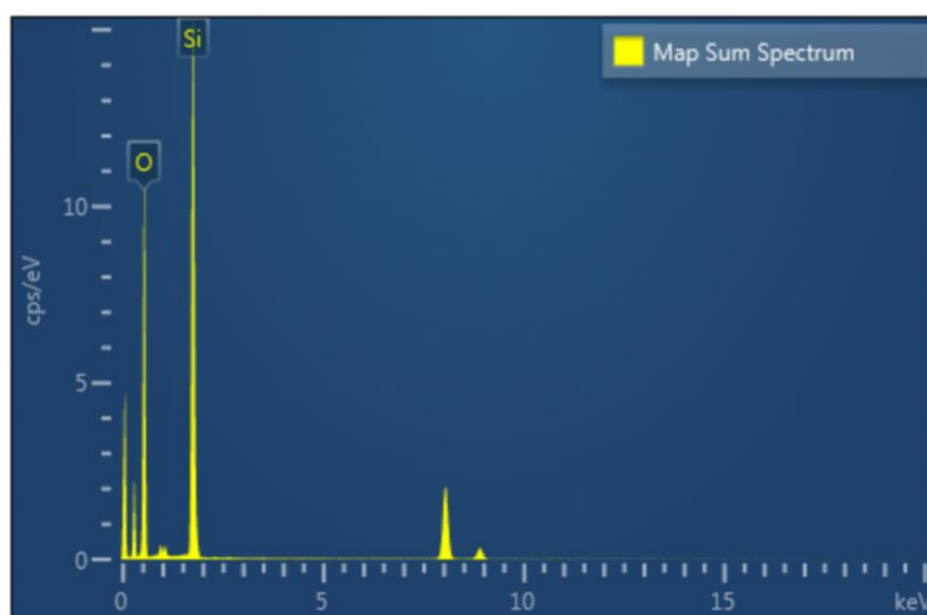

Figure S4. EDX spectrum of HMSN.

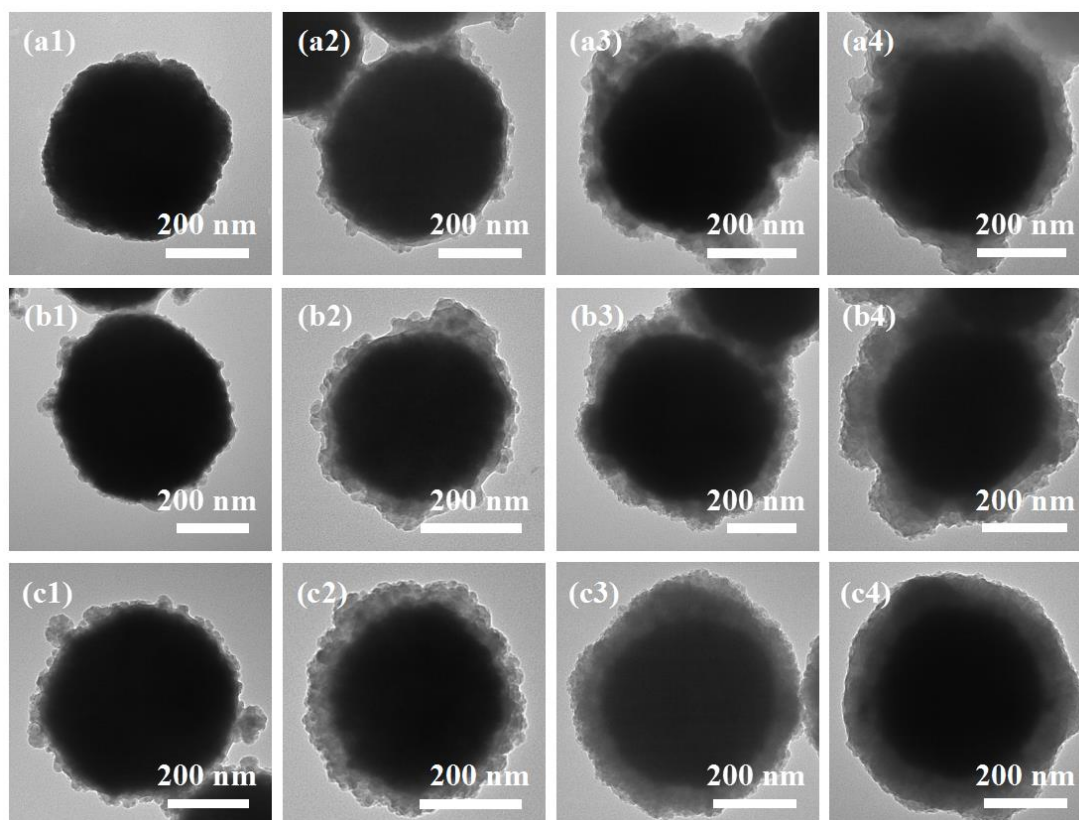

**Figure S5.** TEM images of  $\text{BaSO}_4\text{@APF-SiO}_2$  with different reaction time: 15 min (**a1**, **b1**, and **c1**), 30 min (**a2**, **b2**, and **c2**), 60 min (**a3**, **b3**, and **c3**), and 120 min (**a4**, **b4**, and **c4**). (**a**), (**b**), and (**c**) correspond to different TEOS addition of 0.545, 1.095, and 2.190 mL.

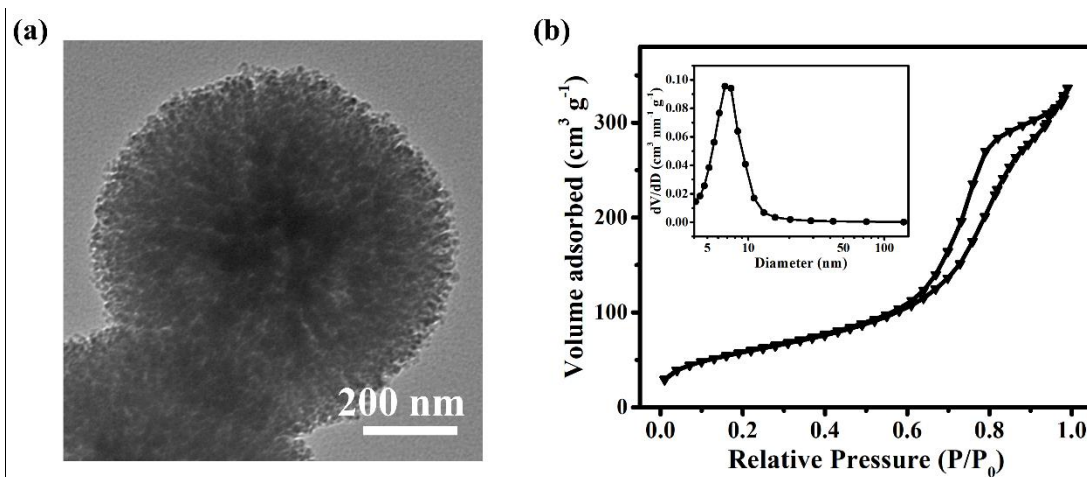

**Figure S6.** (a) TEM image of SMSN; (b)  $\text{N}_2$  sorption isotherm and pore size distribution (inset) of SMSN calculated from desorption branch with BJH model.

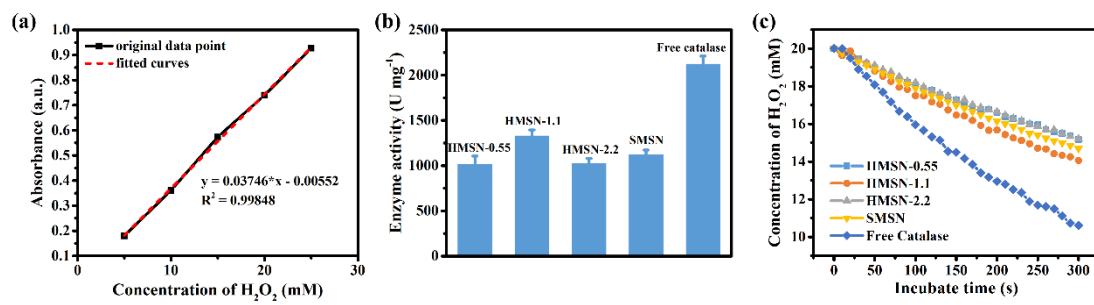

**Figure S7.** (a) Standard curve for  $\text{H}_2\text{O}_2$  detection by UV-vis at 240 nm; (b) Enzyme activity of the catalase loaded in HMSN-0.55, HMSN-1.1, HMSN-2.2, and SMSN, and free catalase; (c) the dynamic experiments for the calculation of enzyme activities in (b).
